# Supplementary material for: Inhibition of Helicobacter pylori and Its Associated Urease by Palmatine: Investigation on the Potential Mechanism
Source: PLoS One. 2017 Jan 3;12(1):e0168944. doi: 10.1371/journal.pone.0168944 (PMC5207512; doi:10.1371/journal.pone.0168944)
Supplement: S2 File — (XLSX) [file pone.0168944.s002.xlsx]

## Sheet: Sheet1
Fig 2
A						B
	Pal（mM）	Residual activity(%)					Pal（mM）	Residual activity(%)
	0.954	24.1839	18.2056	23.6712			0.954	26.1588	18.0767	27.1047
	0.477	49.5621	44.3368	41.1296			0.477	32.5751	31.4745	25.6717
	0.2385	66.7894	71.2237	68.6838			0.2385	38.5515	35.644	36.1648
	0.11925	77.1198	84.6333	83.9334			0.11925	37.8863	32.26	38.6254
	0.059625	88.0275	95.8144	91.8003			0.059625	40.1092	41.6437	45.6491
	0.0298125	91.9885	98.3238	98.6586			0.0298125	50.3004	49.1799	49.0054
	0.0149062	98.5349	97.2774	99.8185			0.0149062	54.1182	57.7693	55.0863
C						D
	Pal（mM）	Residual activity(%)					Pal（mM）	Residual activity(%)
	0.241667	23.1707	20.774	15.3785			0.241667	10.3312	12.3028	11.3019
	0.120833	30.9663	34.9663	29.6848			0.120833	12.8879	13.7831	15.6549
	0.0604167	56.113	64.023	48.6958			0.0604167	24.6949	22.6887	25.4357
	0.0302084	80.4878	87.2209	66.9067			0.0302084	37.3504	39.7719	36.8543
	0.0151042	92.0654	98.3628	84.9736			0.0151042	56.6996	59.4273	55.4239
	0.00755209	94.7515	104.061	86.9419			0.00755209	77.2806	78.6217	75.2345
							0.00377605	91.7722	82.8804	88.2436
							0.00188802	95.2237	88.9105	94.7639
Fig 3
A
	1/urea (mM)	Pal=1.00 mM			Pal=0.50 mM			Pal=0.25 mM			Pal=0 mM
	0.0333333	10.7527	9.78474	8.63558	6.84697	6.4288	8.75273	3.02572	3.12793	3.3428	2.14385	2.26321	2.22519
	0.0666667	12.8452	10.5708	10.7296	7.29395	6.93481	7.39098	3.48857	3.58423	3.79003	2.43072	2.68492	2.58164
	0.133333	12.2775	12.7551	11.5942	8.49979	7.30727	9.1701	3.89788	3.83951	4.10846	2.76778	3.02161	2.97221
	0.266667	16.5017	10.1061	12.6342	11.3701	11.0558	11.0558	4.69153	4.66636	4.79616	3.39789	3.57782	3.663
	0.533333	22.1239	12.1729	15.3022	13.369	12.3993	12.3993	5.57414	5.65771	6.00781	4.07664	4.30107	4.15628
	1.06667	26.3505	13.2013	19.861	12.1433	18.315	12.9786	6.83995	7.10985	7.22022	5.18001	5.77367	5.34759
B
	1/urea 浓度	Pal=1.00 mM			Pal=0.50 mM			Pal=0.25 mM			Pal=0 mM
	0.0333333	7.87712	9.30665	11.4613	6.92281	7.20202	9.22509	6.4288	6.3593	6.73628	3.09502	3.18522	2.78746
	0.0666667	11.4679	16.2867	12.6662	8.80669	9.298	11.1669	8.35771	8.11688	9.84252	4.00641	4.06091	3.91619
	0.133333	16.1031	22.0507	21.7155	18.6916	14.9813	17.4672	12.6502	12.012	28.0899	6.19963	6.75904	5.85309
	0.266667	25.0313	34.7222	40.9836	37.037	24.1255	22.7273	20.429	18.9394	12.8949	9.22935	10.6044	9.04977
	0.533333	40.4858	35.0263	56.6572	57.971	34.3053	43.4783	33.6135	34.6021	27.5862	16.1551	18.9933	16.0901
	1.06667	180.18	147.059	50.2513				51.1509	56.8182	85.4701	28.2087	37.4532	25.0941
Fig 4
A		5 min			10 min			20 min			40 min
	urease							100
	Pal	68.6219	59.3517	62.8958	62.3539	63.3384	60.1303	40.5578	40.1927	40.3586	24.2424	24.8034	25.6852
	DTT	81.4793	82.3893	84.6876	90.4823	88.7843	92.6863	92.2701	94.7893	93.6879	98.9725	95.7934	96.4654
	DTT+Pal	82.0769	81.0424	60.2573	79.5577	99.5218	96.294	84.1715	92.2615	95.6745	91.2241	97.7189	92.6111
	L-Cys	118.44	105.75	100.83	106.798	107.789	108.689	107.503	110.689	108.79	112.442	109.755	113.835
	L-Cys+Pal	114.528	125.777	137.2	104.866	119.816	103.428	87.3461	91.0613	88.2698	75.0225	75.4982	81.0926
	GSH	72.7506	76.4364	74.7983	90.3997	90.6983	94.6848	91.3471	95.4677	94.6985	97.4502	99.7097	95.6984
	GSH+Pal	107.805	92.3675	91.903	97.7725	112.395	111.547	99.0803	101.701	94.2659	100.78	97.4961	98.9074
B		5 min			10 min			20 min			40 min
	urease							100
	Pal	30.8415	25.9711	29.5413	35.2239	34.754	34.6061	32.0917	32.0654	34.2683	32.7298	27.8412	27.745
	DTT	93.6533	90.8565	95.5784	106.756	109.689	104.897	114.01	114.79	115.579	142.945	126.676	135.643
	DTT+Pal	109.545	104.11	107.589	117.061	114.133	121.017	104.371	104.133	112.077	109.042	119.12	101.933
	L-Cys	102.308	100.987	101.693	108.758	106.598	107.687	118.876	118.688	116.565	150.278	147.455	148.699
	L-Cys+Pal	102.328	90.5244	107.966	118.548	114.76	111.875	78.9659	28.5735	11.4664	6.77286	12.4593	14.3634
	GSH	129.053	120.769	117.698	130.204	124.345	121.699	126.298	129.697	128.636	145.92	134.699	136.897
	GSH+Pal	104.507	110.868	108.389	110.963	117.894	121.414	103.408	100.085	106.278	94.6799	102.189	87.9323
C	urease	100					D	urease	100
	urease+BA	98.6098	99.1614	98.0689				urease+BA	87.7801	87.7694	84.1052
	urease+NaF	54.7779	54.0024	55.0707				urease+NaF	41.2392	43.7771	43.724
	urease+Pal	23.1224	23.7773	26.341				urease+Pal	36.1251	35.1723	36.6919
	urease+BA+Pal	21.3647	21.2741	24.6138				urease+BA+Pal	34.8799	32.9868	31.3656
	urease+NaF+Pal	20.9811	20.733	19.3431				urease+NaF+Pal	19.5523	20.4726	19.7116
Fig 5
A		(Protector+Pal)+urease			(urease+Protector)+Pal			(urease+Pal)+Protector
	urease				100
	DTT	93.1647	102.135	96.7756	93.9563	102.92	98.1268	111.632	112.117	108.215
	GSH	90.2174	87.6644	87.7508	86.1759	93.0753	96.5	80.1172	91.0826	85.2319
	L-Cys	83.1714	99.4809	92.6252	104.648	99.847	105.499	81.8452	85.7295	82.3643
	Pal	19.7519	19.3508	19.2504	16.7426	20.1769	19.8815	16.2371	19.7786	20.0443
	DTT+Pal	90.5262	91.6097	92.9825	83.5377	80.665	81.6481	38.6762	40.3737	40.0861
	GSH+Pal	109.365	82.0437	103.617	97.6826	98.3491	98.0881	46.6913	50.8698	50.2445
	L-Cys+Pal	73.2416	75.5655	76.7783	79.1564	73.2075	74.2255	41.9936	38.866	40.9348
B		(Protector+Pal)+urease			(urease+Protector)+Pal			(urease+Pal)+Protector
	urease				100
	DTT	164.505	163.42	167.948	175.198	170.348	183.958	141.035	115.717	156.562
	GSH	139.087	138.739	139.918	109.406	155.988	160.149	124.19	138.345	140.452
	L-Cys	147.275	149.198	148.645	145.93	142.617	148.155	128.889	127.748	168.24
	Pal	43.3064	46.0366	49.8851	35.4145	36.4539	38.3985	35.6198	34.4052	37.9815
	DTT+Pal	160.706	165.347	163.68	191.97	180.024	190.739	130.996	123.278	123.665
	GSH+Pal	131.317	134.74	139.632	187.585	183.595	168.218	120.456	118.564	114.702
	L-Cys+Pal	144.426	147.085	142.66	152.937	160.001	158.865	107.93	106.555	101.268
Fig 6
A	Incubation time (min)	Pal+HPU			Pal+HPU+DTT			DTT+urease
	0	100	100	100
	5	53.998	46.6272	48.0175				88.7241	81.9292	95.491
	10	49.3275	58.3637	53.8299				99.0712	98.1423	99.0165
	15	49.332	42.2279	35.3616				97.2572	95.4326	99.1346
	20	31.7606	33.8317	28.1184				92.9515	87.6438	97.9325
	21				31.9669	35.8526	31.9444
	24				23.5145	30.8615	25.0617
	25	28.0689	29.1215	31.6008
	30				35.0929	37.7824	29.5976
	35				38.1192	36.983	34.8545
	40	18.3175	17.1238	27.4024	42.5864	38.3965	35.0922	91.5048	89.9013	92.9813
	60	19.5929	16.185	23.3408				92.5129	87.7924	98.0126
	65				31.3982	33.9474	46.6087
	80				38.6551	37.2887	35.7915
	90	20.1977	20.8942	10.5174				89.1159	85.7645	91.4647
	100				41.3198	43.1587	37.3086
	120	7.01694	11.5097	16.0843	49.5101	42.7208	45.1054	88.9974	82.2782	96.0166
B	Incubation time (min)	Pal+JBU			Pal+JBU+DTT			DTT+urease
	0	100	100
	5	32.1526	23.3078	25.9028				114.981	108.343	121.742
	10	20.4727	19.6698	19.9717				112.928	115.246	110.236
	15	21.6378	31.4263	25.9921				116.183	119.514	113.236
	20	30.9154	23.3924	26.9255				121.265	120.209	121.141
	21				66.0724	63.0284	65.0984
	24				85.1349	70.5429	78.9839
	25	17.3155	20.9314	20.015				120.291	121.459	120.019
	30				85.6589	63.8988	75.2319
	35				89.4817	91.1899	91.0139
	40	15.9579	18.715	18.0134				105.801	103.225	107.983
	60	11.2571	13.0605	11.8012				107.798	104.326	111.088
	65				93.8682	91.6543	91.9123
	80				88.3944	85.5083	87.0135
	90	26.5034	7.72201	19.0427				104.437	101.122	107.125
	100				88.8076	75.6328	81.9981
	120	2.93949	2.25473	3.59017	80.4133	76.5032	78.5012	110.524	108.243	112.893
